# Supplementary material
Source: PubMed Central journal article supplement (PMC2813708)
Supplement: NIHMS169986-supplement-Supp_Data.pdf [file NIHMS169986-supplement-Supp_Data.pdf]

Supp Fig 1 Categorization of the genes regulated in the adult but not the neonate dorsal horn following peripheral nerve injury by 'Function and Disease' within the Ingenuity Pathway Analysis (IPA) software system. Bars represent the LOD value ( $-\log(p\text{-value})$ ) of the likelihood of an association between the Function and Disease gene groups with the genes in the Ad0.05/Ne0.9 list (right-tailed Fisher's Exact Test); Only functional categories with LOD scores of above 10 shown. Immune related gene groups marked.

Supp Fig 2 **A**; Mechanical sensitivity as assayed by von Frey stimulation does not vary when assayed on the ipsilateral hindpaw relative to the contralateral paw of the same animal as a function of time subsequent to SNI injury in T cell deficient Nude mice. **B**; Mechanical sensitivity (von Frey) is significantly reduced on the ipsilateral hindpaw relative to the contralateral paw of the same animal over time subsequent to SNI injury in B cell deficient mice. All data are mean  $\pm$  SEM, one-way ANOVA, Students t-test \* $P < 0.05$ ,  $n=6$  animals per group.

Supp Fig 3 CD4 (**A**) and CD8 (**B**) expression in the dorsal horn of the spinal cord of neonatal and adult rats over time post SNI relative to age matched controls and uninjured animals respectively, detected by Q-PCR. Data are expressed as mean fold  $\pm$ SEM, one-way ANOVA, \* $P < 0.05$  Student's t-test,  $n=4$  per group.

Supp Table 1 Genes identified by microarray analysis to be regulated in the neonatal dorsal horn 7 days post SNI relative to age match control sham animals.

Supp Table 2 Genes identified by microarray analysis to be regulated in the adult dorsal horn 7 days post SNI relative to sham control animals.

Supp Table 3 Genes identified by microarray analysis to be regulated in the adult dorsal horn 7 days post SNI ( $p < 0.05$ ) but showed minimal statistical evidence of regulation in the neonate ( $p > 0.9$ ); the Ad0.05Ne0.9 list.

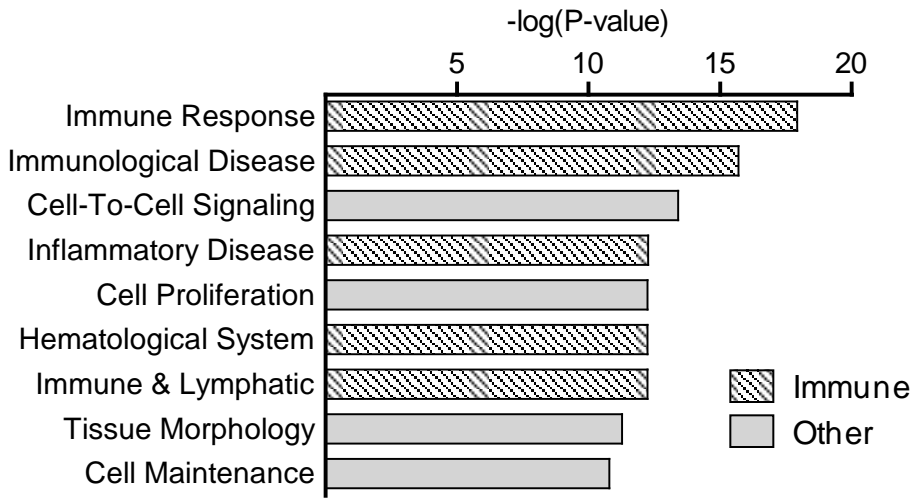

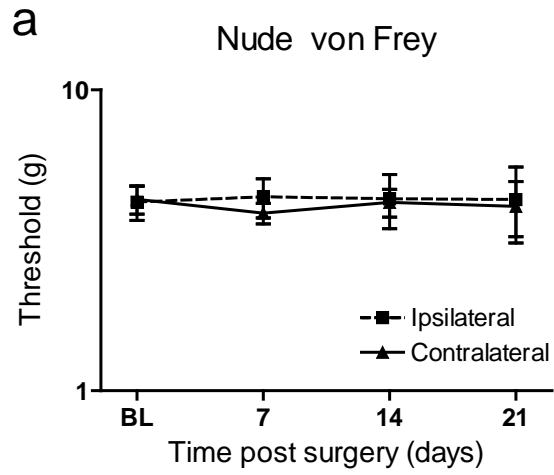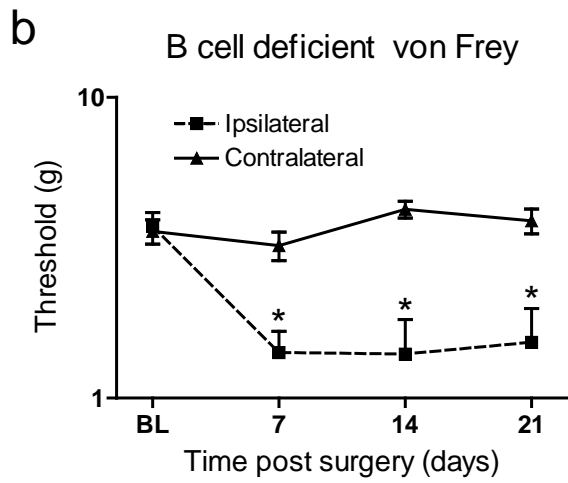

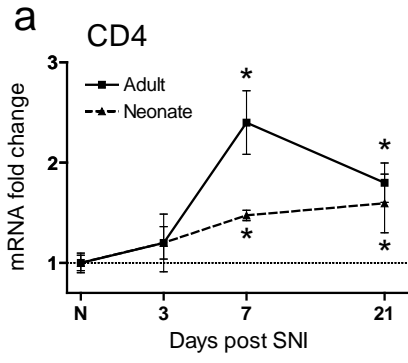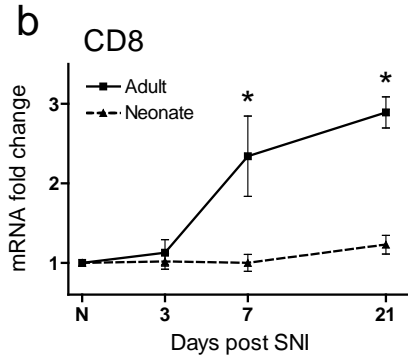

| <b>Fold Change</b> | <b>False Discovery Rate</b> | <b>ID</b>    | <b>Notes</b> | <b>Molecules</b>          | <b>Description</b>                                                                                     |
|--------------------|-----------------------------|--------------|--------------|---------------------------|--------------------------------------------------------------------------------------------------------|
| 1.222              | 0.002                       | 1368558_s_at |              | AIF1                      | allograft inflammatory factor 1                                                                        |
| 0.973              | 0.001                       | 1367974_at   |              | ANXA3                     | annexin A3                                                                                             |
| 1.882              |                             | 01376652_at  |              | C1QA                      | complement component 1, q subcomponent, A chain                                                        |
| 2.132              | 0.002                       | 1370215_at   |              | C1QB                      | complement component 1, q subcomponent, B chain                                                        |
| 2.2                | 0.001                       | 1373025_at   |              | C1QC                      | complement component 1, q subcomponent, C chain                                                        |
| 3.042              |                             | 01368000_at  |              | C3                        | complement component 3                                                                                 |
| 1.44               | 0.04                        | 1370892_at   |              | C4A                       | complement component 4A (Rodgers blood group)                                                          |
| 1.26               | 0.031                       | 1369290_at   |              | CCR5                      | chemokine (C-C motif) receptor 5                                                                       |
| 0.973              | 0.002                       | 1368518_at   |              | CD53                      | CD53 molecule                                                                                          |
| 2.322              | 0.018                       | 1367679_at   |              | CD74                      | CD74 molecule, major histocompatibility complex, class II invariant chain                              |
| 0.987              | 0.004                       | 1388784_at   |              | CSF1R                     | colony stimulating factor 1 receptor, formerly McDonough feline sarcoma viral (v-fms) oncogene homolog |
| 1.438              | 0.016                       | 1370885_at   |              | CTSZ (includes EG:252929) | cathepsin Z                                                                                            |
| 1.211              | 0.002                       | 1398246_s_at |              | FCGR2A                    | Fc fragment of IgG, low affinity IIa, receptor (CD32)                                                  |
| 1.094              | 0.008                       | 1370428_x_at |              | HLA-G                     | major histocompatibility complex, class I, G                                                           |
| 0.853              | 0.042                       | 1368006_at   |              | LAPTM5                    | lysosomal associated multispinning membrane protein 5                                                  |
| 1.192              | 0.002                       | 1367850_at   |              | LOC498276                 | Fc gamma receptor II beta                                                                              |
| 1.084              | 0.023                       | 1373575_at   |              | LOC498279                 | similar to NADH dehydrogenase (ubiquinone) Fe-S protein 2                                              |
| 2.234              | 0.002                       | 1371447_at   |              | PLAC8                     | placenta-specific 8                                                                                    |
| 0.625              | 0.02                        | 1375211_at   |              | RNASET2                   | ribonuclease T2                                                                                        |
| 0.978              |                             | 01373204_at  |              | TMEM176A                  | transmembrane protein 176A                                                                             |
| 0.773              | 0.006                       | 1368840_at   |              | TMEM176B                  | transmembrane protein 176B                                                                             |
| 1.035              | 0.005                       | 1374730_at   |              | TYROBP                    | TYRO protein tyrosine kinase binding protein                                                           |
| 1.124              | 0.019                       | 1389006_at   |              |                           |                                                                                                        |

| <b>Fold Change</b> | <b>False Discover y Rate (q-value)</b> | <b>ID</b>     | <b>Notes</b> | <b>Molecules</b> | <b>Description</b>                                                                  |
|--------------------|----------------------------------------|---------------|--------------|------------------|-------------------------------------------------------------------------------------|
| 0.924              | 0.002                                  | 1390383_at    |              | ADFP             | adipose differentiation-related protein                                             |
| 0.167              | 0.001                                  | 1369272_at    |              | ADORA3           | adenosine A3 receptor                                                               |
| 2.135              |                                        | 01368558_s_at |              | AIF1             | allograft inflammatory factor 1                                                     |
| 2.418              |                                        | 01367975_at   | D            | ANXA3            | annexin A3                                                                          |
| 1.759              |                                        | 01367974_at   | D            | ANXA3            | annexin A3                                                                          |
| 1.23               |                                        | 01377239_at   |              | APBB1IP          | amyloid beta (A4) precursor protein-binding, family B, member 1 interacting protein |
| -0.448             | 0.022                                  | 1389651_at    |              | APLN             | apelin, AGTRL1 ligand                                                               |
| 1.007              |                                        | 01368270_at   |              | APOBEC1          | apolipoprotein B mRNA editing enzyme, catalytic polypeptide 1                       |
| 0.861              | 0.002                                  | 1388940_at    |              | ARHGAP25         | Rho GTPase activating protein 25                                                    |
| 1.404              | 0.001                                  | 1373881_at    |              | ARHGDIB          | Rho GDP dissociation inhibitor (GDI) beta                                           |
| 1.536              | 0.003                                  | 1386925_at    |              | ARPC1B           | actin related protein 2/3 complex, subunit 1B, 41kDa                                |
| 2.243              | 0.014                                  | 1369268_at    |              | ATF3             | activating transcription factor 3                                                   |
| 0.315              | 0.005                                  | 1374831_at    |              | ATHL1            | ATH1, acid trehalase-like 1 (yeast)                                                 |
| 0.841              | 0.001                                  | 1398347_at    |              | AXL              | AXL receptor tyrosine kinase                                                        |
| 1.482              |                                        | 01374367_at   |              | AY616753         | cDNA sequence, AY616753                                                             |
| 0.405              | 0.03                                   | 1367595_s_at  |              | B2M              | beta-2-microglobulin                                                                |
| 1.558              |                                        | 01390287_at   | D            | BIN2             | bridging integrator 2                                                               |
| 0.587              | 0.011                                  | at            | D            | BIN2             | bridging integrator 2                                                               |
| -0.246             | 0.041                                  | 1374192_at    |              | BSN              | bassoon (presynaptic cytomatrix protein)                                            |
| 0.419              | 0.022                                  | 1367657_at    |              | BTG1             | B-cell translocation gene 1, anti-proliferative                                     |
| 2.658              |                                        | 01376652_at   |              | C1QA             | complement component 1, q subcomponent, A chain                                     |
| 3.156              |                                        | 01370215_at   |              | C1QB             | complement component 1, q subcomponent, B chain                                     |
| 3.644              |                                        | 01373025_at   |              | C1QC             | complement component 1, q subcomponent, C chain                                     |
| 3.152              |                                        | 01368000_at   |              | C3               | complement component 3                                                              |
| 3.344              |                                        | 01370892_at   |              | C4A              | complement component 4A (Rodgers blood group)                                       |
| 0.165              | 0.046                                  | 1389054_at    |              | C4ORF19          | chromosome 4 open reading frame 19                                                  |
| 0.485              | 0.009                                  | 1390144_at    |              | C9ORF72          | chromosome 9 open reading frame 72                                                  |
| 0.678              |                                        | 01368637_at   |              | CARD9            | caspase recruitment domain family, member 9                                         |
| 1.67               | 0.049                                  | 1367973_at    |              | CCL13            | chemokine (C-C motif) ligand 13                                                     |
| 1.538              | 0.001                                  | 1369290_at    |              | CCR5             | chemokine (C-C motif) receptor 5                                                    |
| 1.829              |                                        | 01368555_at   |              | CD37             | CD37 molecule                                                                       |
| 1.564              |                                        | 01369483_at   |              | CD4              | CD4 molecule                                                                        |
| 2.075              |                                        | 01368518_at   |              | CD53             | CD53 molecule                                                                       |
| 2.837              |                                        | 01375010_at   |              | CD68             | CD68 molecule                                                                       |
| 0.607              | 0.011                                  | 1374544_at    |              | CDH23            | cadherin-like 23                                                                    |

|       |                   |                  |                                                                                       |
|-------|-------------------|------------------|---------------------------------------------------------------------------------------|
| 1.289 | 0.0081387029_at   | CFH              | complement factor H                                                                   |
| 0.722 | 0.0041374537_at   | CHSY1            | carbohydrate (chondroitin) synthase 1                                                 |
| 2.866 | 01389553_at       | CLEC4A3          | C-type lectin domain family 4, member a3                                              |
| 0.929 | 01375633_at       | CLIC1            | chloride intracellular channel 1                                                      |
| 0.43  | 0.0491372478_at   | CMTM7            | CKLF-like MARVEL transmembrane domain containing 7                                    |
| 0.666 | 0.0111374731_at   | COIL             | coilin                                                                                |
| 0.916 | 01369964_at       | CORO1A           | coronin, actin binding protein, 1A                                                    |
|       | 1368418_a_        |                  |                                                                                       |
| 2.085 | 0at               | D CP             | ceruloplasmin (ferroxidase)                                                           |
| 1.066 | 0.0351368420_at   | D CP             | ceruloplasmin (ferroxidase)                                                           |
| 0.513 | 0.011368419_at    | D CP             | ceruloplasmin (ferroxidase)                                                           |
| 0.339 | 0.0231375428_at   | CREG1            | cellular repressor of E1A-stimulated genes 1                                          |
|       |                   |                  | colony stimulating factor 1 receptor, formerly McDonough feline sarcoma viral (v-fms) |
| 1.68  | 01388784_at       | CSF1R            | oncogene homolog                                                                      |
| 0.586 | 0.0071368280_at   | CTSC             | cathepsin C                                                                           |
| 1.15  | 01386899_at       | CTSH             | cathepsin H                                                                           |
| 0.911 | 01387005_at       | CTSS             | cathepsin S                                                                           |
|       |                   | CTSZ (includes   |                                                                                       |
| 2.191 | 01370885_at       | EG:252929)       | cathepsin Z                                                                           |
| 1.627 | 0.0481369527_at   | CX3CR1           | chemokine (C-X3-C motif) receptor 1                                                   |
| 5.152 | 01398390_at       | CXCL13           | chemokine (C-X-C motif) ligand 13 (B-cell chemoattractant)                            |
| 0.923 | 0.0011372064_at   | CXCL16           | chemokine (C-X-C motif) ligand 16                                                     |
| 1.318 | 01370219_at       | CYBA             | cytochrome b-245, alpha polypeptide                                                   |
| 0.724 | 0.0051369181_at   | CYBB             | cytochrome b-245, beta polypeptide (chronic granulomatous disease)                    |
| 0.681 | 0.021387024_at    | DUSP6            | dual specificity phosphatase 6                                                        |
| 0.611 | 0.0331390285_at   | EFCAB4A          | EF-hand calcium binding domain 4A                                                     |
| 0.536 | 0.0231375739_at   | EHD4             | EH-domain containing 4                                                                |
| 1.109 | 0.0011398246_s_at | FCGR2A           | Fc fragment of IgG, low affinity IIa, receptor (CD32)                                 |
| 3.082 | 01371079_at       | FCGR2B           | Fc fragment of IgG, low affinity IIb, receptor (CD32)                                 |
| 3.629 | 01373523_at       | FCGR3A           | Fc fragment of IgG, low affinity IIIa, receptor (CD16a)                               |
| 0.626 | 0.0031388740_at   | FERMT3           | fermitin family homolog 3 (Drosophila)                                                |
| 0.278 | 0.0381390374_at   | FGFRL1           | fibroblast growth factor receptor-like 1                                              |
| 0.548 | 0.0011368207_at   | FXYD5            | FXYD domain containing ion transport regulator 5                                      |
| 1.554 | 01368332_at       | GBP2             | guanylate binding protein 2, interferon-inducible                                     |
| 0.525 | 0.021372050_at    | GLT25D1          | glycosyltransferase 25 domain containing 1                                            |
| 0.863 | 0.0031373490_at   | GMFG             | glia maturation factor, gamma                                                         |
| 0.552 | 0.0041371894_at   | GNS              | glucosamine (N-acetyl)-6-sulfatase (Sanfilippo disease IIID)                          |
| 1.2   | 01390050_at       | GOLPH2 PREDICTED | golgi phosphoprotein 2 (predicted)                                                    |
| 0.983 | 01373754_at       | GOLPH2 PREDICTED | golgi phosphoprotein 2 (predicted)                                                    |
| 1.743 | 01368187_at       | GPNMB            | glycoprotein (transmembrane) nmb                                                      |



|       |                   |           |                                                                                   |
|-------|-------------------|-----------|-----------------------------------------------------------------------------------|
| 1.505 | 01386893_at       | GRN       | granulin                                                                          |
| 0.348 | 0.0011388255_x_at | H2-BL     | histocompatibility 2, blastocyst                                                  |
| 0.547 | 0.0451369204_at   | HCK       | hemopoietic cell kinase                                                           |
| 0.742 | 0.0041372706_at   | HEXB      | hexosaminidase B (beta polypeptide)                                               |
| 1.553 | 01383519_at       | HK2       | hexokinase 2                                                                      |
| 1.344 | 0.0011370904_at   | HLA-DMA   | major histocompatibility complex, class II, DM alpha                              |
| 1.362 | 01370882_at       | HLA-DMB   | major histocompatibility complex, class II, DM beta                               |
| 0.963 | 0.0091388213_a_at | HLA-E     | major histocompatibility complex, class I, E                                      |
| 1.518 | 0at<br>1370428_x_ | HLA-G     | major histocompatibility complex, class I, G                                      |
| 0.883 | 0.004at           | HLA-G     | major histocompatibility complex, class I, G                                      |
| 0.341 | 0.0081371336_at   | HN1       | hematological and neurological expressed 1                                        |
| 1.158 | 0.0021387202_at   | ICAM1     | intercellular adhesion molecule 1 (CD54), human rhinovirus receptor               |
| 0.824 | 0.0111374558_at   | ICOSLG    | inducible T-cell co-stimulator ligand                                             |
| 1.561 | 01372070_at       | IFI30     | interferon, gamma-inducible protein 30                                            |
| 1.275 | 01369956_at       | IFNGR1    | interferon gamma receptor 1                                                       |
| 0.602 | 0.0221374601_at   | IFNGR2    | interferon gamma receptor 2 (interferon gamma transducer 1)                       |
| 0.339 | 0.0041375716_at   | IFNGR2    | interferon gamma receptor 2 (interferon gamma transducer 1)                       |
| 0.632 | 0.031388711_at    | IL13RA1   | interleukin 13 receptor, alpha 1                                                  |
| 0.877 | 0.0211373611_at   | IL17RA    | interleukin 17 receptor A                                                         |
| 1.648 | 01369665_a_at     | IL18      | interleukin 18 (interferon-gamma-inducing factor)                                 |
| 1.017 | 0.0021387198_at   | INPP5D    | inositol polyphosphate-5-phosphatase, 145kDa                                      |
| 0.549 | 0.0471368073_at   | IRF1      | interferon regulatory factor 1                                                    |
| 2.589 | 01372097_at       | IRF8      | interferon regulatory factor 8                                                    |
| 0.423 | 0.0281388046_at   | ITGAM     | integrin, alpha M (complement component 3 receptor 3 subunit)                     |
| 0.873 | 0.0221392785_at   | KCTD12    | potassium channel tetramerisation domain containing 12                            |
| 0.746 | 01373262_at       | KIAA1949  | KIAA1949                                                                          |
| 1.348 | 01377153_a_at     | KLHL6     | kelch-like 6 (Drosophila)                                                         |
| 0.614 | 0.0121367683_at   | KPNA2     | karyopherin alpha 2 (RAG cohort 1, importin alpha 1)                              |
| 1.561 | 01368006_at       | LAPTM5    | lysosomal associated multispinning membrane protein 5                             |
| 1.272 | 0.0051389210_at   | LCP1      | lymphocyte cytosolic protein 1 (L-plastin)                                        |
| 1.034 | 01370090_at       | LCP2      | lymphocyte cytosolic protein 2 (SH2 domain containing leukocyte protein of 76kDa) |
| 0.886 | 01390797_at       | LCP2      | lymphocyte cytosolic protein 2 (SH2 domain containing leukocyte protein of 76kDa) |
| 1.551 | 01387946_at       | LGALS3BP  | lectin, galactoside-binding, soluble, 3 binding protein                           |
| 0.57  | 0.0021368430_at   | LGMN      | legumain                                                                          |
| 0.636 | 0.0061389885_at   | LIMD2     | LIM domain containing 2                                                           |
| 0.33  | 0.0111389017_at   | LOC305633 | similar to Antxr2 protein                                                         |
| 1.069 | 0.0011367850_at   | LOC498276 | Fc gamma receptor II beta                                                         |
| 1.865 | 01373575_at       | LOC498279 | similar to NADH dehydrogenase (ubiquinone) Fe-S protein 2                         |

|       |                 |          |                                                                                           |
|-------|-----------------|----------|-------------------------------------------------------------------------------------------|
| 0.415 | 0.0061374626_at | LRG1     | leucine-rich alpha-2-glycoprotein 1                                                       |
| 2.572 | 01393280_at     | LY86     | lymphocyte antigen 86                                                                     |
| 1.104 | 01368679_a_at   | LYN      | v-yes-1 Yamaguchi sarcoma viral related oncogene homolog                                  |
| 1.002 | 0.0181370154_at | LYZ      | lysozyme (renal amyloidosis)                                                              |
| 0.952 | 0.0011388699_at | MAN2B1   | mannosidase, alpha, class 2B, member 1                                                    |
| 0.527 | 0.0251372546_at | MAPKAPK3 | mitogen-activated protein kinase-activated protein kinase 3                               |
| 0.813 | 0.0071373410_at | MEF2C    | myocyte enhancer factor 2C                                                                |
| 0.494 | 0.0031371998_at | MOBKL1B  | MOB1, Mps One Binder kinase activator-like 1B (yeast)                                     |
| 2.325 | 01369427_at     | MPEG1    | macrophage expressed gene 1                                                               |
| 1.606 | 0.0021371015_at | MX2      | myxovirus (influenza virus) resistance 2 (mouse)                                          |
| 0.485 | 0.0081374468_at | MYD88    | myeloid differentiation primary response gene (88)                                        |
| 0.865 | 0.0241389474_at | MYLIP    | myosin regulatory light chain interacting protein                                         |
| 0.719 | 0.0061387413_at | NCF1C    | neutrophil cytosolic factor 1C pseudogene                                                 |
| 0.555 | 0.0031374565_at | NEK6     | NIMA (never in mitosis gene a)-related kinase 6                                           |
| 0.467 | 0.0461367826_at | NFE2L2   | nuclear factor (erythroid-derived 2)-like 2                                               |
| 0.566 | 0.0041370968_at | NFKB1    | nuclear factor of kappa light polypeptide gene enhancer in B-cells 1 (p105)               |
| 0.859 | 01398892_at     | NPC2     | Niemann-Pick disease, type C2                                                             |
| 1.106 | 0.0291373577_at | NRP1     | neuropilin 1                                                                              |
| 1.049 | 0.0091369200_at | NT5E     | 5'-nucleotidase, ecto (CD73)                                                              |
| 0.679 | 0.0321388425_at | OAF      | OAF homolog (Drosophila)                                                                  |
| 0.541 | 0.0121370449_at | P2RY14   | purinergic receptor P2Y, G-protein coupled, 14                                            |
| 1.087 | 0.0021368754_at | P2RY6    | pyrimidineric receptor P2Y, G-protein coupled, 6                                          |
| 1.016 | 01372034_at     | PARP14   | poly (ADP-ribose) polymerase family, member 14                                            |
| 1.499 | 01376144_at     | PARP9    | poly (ADP-ribose) polymerase family, member 9                                             |
| 0.554 | 0.041387153_at  | PDLIM4   | PDZ and LIM domain 4                                                                      |
| 0.75  | 0.0031386913_at | PDPN     | podoplanin                                                                                |
| 1.166 | 01387566_at     | PLA2G4A  | phospholipase A2, group IVA (cytosolic, calcium-dependent)                                |
| 4.422 | 01371447_at     | PLAC8    | placenta-specific 8                                                                       |
| 1.57  | 01390687_at     | PLEK     | pleckstrin                                                                                |
| 0.557 | 0.0011387114_at | PRKCD    | protein kinase C, delta                                                                   |
| 0.752 | 0.0011371037_at | PROS1    | protein S (alpha)                                                                         |
| 2.214 | 01367786_at     | PSMB8    | proteasome (prosome, macropain) subunit, beta type, 8 (large multifunctional peptidase 7) |
| 0.832 | 0.0011367663_at | PSME1    | proteasome (prosome, macropain) activator subunit 1 (PA28 alpha)                          |
| 0.575 | 0.0111368645_at | PTPN1    | protein tyrosine phosphatase, non-receptor type 1                                         |
| 1.177 | 01373065_at     | PTPN18   | protein tyrosine phosphatase, non-receptor type 18 (brain-derived)                        |
| 1.297 | 01368010_at     | PTPN6    | protein tyrosine phosphatase, non-receptor type 6                                         |
| 1.732 | 01390798_at D   | PTPRC    | protein tyrosine phosphatase, receptor type, C                                            |
| 1.441 | 0.001at D       | PTPRC    | protein tyrosine phosphatase, receptor type, C                                            |
| 1.367 | 01389873_at     | PYCARD   | PYD and CARD domain containing                                                            |

|       |                   |            |                                                                                             |
|-------|-------------------|------------|---------------------------------------------------------------------------------------------|
| 0.601 | 0.0411368674_at   | PYGL       | phosphorylase, glycogen; liver (Hers disease, glycogen storage disease type VI)             |
| 1.757 | 01372404_at       | RAC2       | ras-related C3 botulinum toxin substrate 2 (rho family, small GTP binding protein Rac2)     |
| 0.368 | 0.0071387806_at   | RAP1B      | RAP1B, member of RAS oncogene family                                                        |
| 0.266 | 01374165_at       | RASA4      | RAS p21 protein activator 4                                                                 |
| 3.644 | 0.0181368238_at   | REG3A      | regenerating islet-derived 3 alpha                                                          |
|       |                   | RGD1562552 |                                                                                             |
| 1.695 | 0.0051390226_at   | PREDICTED  | similar to hypothetical protein LOC340061 (predicted)                                       |
|       |                   | RGD1566254 |                                                                                             |
| 1.395 | 0.0011372585_at   | PREDICTED  | RGD1566254 (predicted)                                                                      |
| 0.612 | 0.0011390707_at   | RGS10      | regulator of G-protein signaling 10                                                         |
| 0.483 | 0.0031387074_at   | RGS2       | regulator of G-protein signaling 2, 24kDa                                                   |
| 1.21  | 01375211_at       | RNASSET2   | ribonuclease T2                                                                             |
| 0.265 | 0.0471371308_at   | RPS4X      | ribosomal protein S4, X-linked                                                              |
| 1.254 | 01389408_at       | RRM2       | ribonucleotide reductase M2 polypeptide                                                     |
| 0.753 | 0.0011371090_at   | SCAMP2     | secretory carrier membrane protein 2                                                        |
| 2.331 | 01377034_at       | SERPINB1   | serpin peptidase inhibitor, clade B (ovalbumin), member 1                                   |
| 0.696 | 0.0021367723_a_at | SH2B3      | SH2B adaptor protein 3                                                                      |
| 0.376 | 0.0121367881_at   | SIRPA      | signal-regulatory protein alpha                                                             |
| 0.979 | 01369979_at       | SKAP2      | src kinase associated phosphoprotein 2                                                      |
| 1.412 | 01379766_at       | SLA        | Src-like-adaptor                                                                            |
| 0.284 | 0.0281387808_at   | SLC7A7     | solute carrier family 7 (cationic amino acid transporter, y+ system), member 7              |
| 1.135 | 01368296_at D     | SLCO2B1    | solute carrier organic anion transporter family, member 2B1                                 |
| 1.12  | 01368295_at D     | SLCO2B1    | solute carrier organic anion transporter family, member 2B1                                 |
| 0.57  | 0.0111374976_a_at | SOAT1      | sterol O-acyltransferase (acyl-Coenzyme A: cholesterol acyltransferase) 1                   |
| 1.224 | 0.0011372930_at   | SP110      | SP110 nuclear body protein                                                                  |
| 0.519 | 01373612_at       | SSH2       | slingshot homolog 2 (Drosophila)                                                            |
| 0.676 | 0.0391387354_at D | STAT1      | signal transducer and activator of transcription 1, 91kDa                                   |
| 0.444 | 0.0331368835_at D | STAT1      | signal transducer and activator of transcription 1, 91kDa                                   |
| 0.612 | 0.0091367936_at   | STK10      | serine/threonine kinase 10                                                                  |
| 0.464 | 0.0351369554_at   | SYNGR2     | synaptogyrin 2                                                                              |
| 0.762 | 0.0011368012_at   | TEP1       | telomerase-associated protein 1                                                             |
| 0.854 | 0.0031370082_at   | TGFB1      | transforming growth factor, beta 1                                                          |
| 0.873 | 0.0041376636_at   | TGFBR1     | transforming growth factor, beta receptor I (activin A receptor type II-like kinase, 53kDa) |
| 1.242 | 01367712_at       | TIMP1      | TIMP metalloproteinase inhibitor 1                                                          |
| 1.755 | 01373204_at       | TMEM176A   | transmembrane protein 176A                                                                  |
| 1.331 | 01368840_at       | TMEM176B   | transmembrane protein 176B                                                                  |
| 0.922 | 0.0081367715_at   | TNFRSF1A   | tumor necrosis factor receptor superfamily, member 1A                                       |
| -1.4  | 0.0281372195_at   | TNNC2      | troponin C type 2 (fast)                                                                    |
| 0.962 | 01371239_s_at     | TPM3       | tropomyosin 3                                                                               |
| 0.325 | 0.0141371688_at   | TRAM1      | translocation associated membrane protein 1                                                 |

|        |                               |         |                                                      |
|--------|-------------------------------|---------|------------------------------------------------------|
| 1.198  | 0.0021368052_at               | TSPAN8  | tetraspanin 8                                        |
| 2.379  | 01370249_at                   | TSPO    | translocator protein (18kDa)                         |
| 1.548  | 01374730_at                   | TYROBP  | TYRO protein tyrosine kinase binding protein         |
| 1.03   | 0.0071368669_at<br>1387759_s_ | UCP2    | uncoupling protein 2 (mitochondrial, proton carrier) |
| 1.004  | 0.002at D<br>1370613_s_       | UGT1A6  | UDP glucuronosyltransferase 1 family, polypeptide A6 |
| 0.619  | 0at D                         | UGT1A6  | UDP glucuronosyltransferase 1 family, polypeptide A6 |
| 0.684  | 0.0021372459_at               | VASP    | vasodilator-stimulated phosphoprotein                |
| 1.243  | 01369387_at                   | VAV1    | vav 1 guanine nucleotide exchange factor             |
| 0.545  | 0.0241368359_a_at             | VGf     | VGf nerve growth factor inducible                    |
| 0.474  | 0.0071389512_at               | XIRP1   | xin actin-binding repeat containing 1                |
| 0.799  | 0.0041369959_at               | ZFP36L1 | zinc finger protein 36, C3H type-like 1              |
| 0.866  | 0.0011373106_at               | ZFP36L2 | zinc finger protein 36, C3H type-like 2              |
| 1.97   | 01389006_at                   |         |                                                      |
| 1.923  | 01373785_at                   |         |                                                      |
| 1.681  | 0.0111374429_at               |         |                                                      |
| 1.292  | 01373932_at                   |         |                                                      |
| 1.122  | 01373818_at                   |         |                                                      |
| 1.085  | 0.0061380822_at               |         |                                                      |
| 1.017  | 0.0021384191_at               |         |                                                      |
| 0.987  | 0.0111389617_at               |         |                                                      |
| 0.896  | 01377198_at                   |         |                                                      |
| 0.894  | 01376151_a_at                 |         |                                                      |
| 0.814  | 0.0171373252_at               |         |                                                      |
| 0.79   | 01373062_at                   |         |                                                      |
| 0.732  | 01389742_at                   |         |                                                      |
| 0.72   | 0.0231373233_at               |         |                                                      |
| 0.696  | 0.0091377092_at               |         |                                                      |
| 0.677  | 0.0111388887_at               |         |                                                      |
| 0.626  | 01372332_at                   |         |                                                      |
| 0.626  | 0.0111382680_at               |         |                                                      |
| 0.592  | 0.0171398369_at               |         |                                                      |
| 0.415  | 0.0081371821_at               |         |                                                      |
| 0.415  | 0.041375523_at                |         |                                                      |
| 0.302  | 0.0071373225_at               |         |                                                      |
| -0.268 | 0.0071398462_at               |         |                                                      |
| -0.625 | 0.0011398462_at               |         |                                                      |

| False Discover y Rate (q-<br>Log Ratio value) | ID    | Notes   | Molecules | Description                                                                         |
|-----------------------------------------------|-------|---------|-----------|-------------------------------------------------------------------------------------|
| 0.924                                         | 0.002 | 298199D | ADFP      | adipose differentiation-related protein                                             |
| 0.626                                         | 0.011 | 298199D | ADFP      | adipose differentiation-related protein                                             |
| 0.167                                         | 0.001 | 25370   | ADORA3    | adenosine A3 receptor                                                               |
| 1.23                                          | 0     | 307171  | APBB1IP   | amyloid beta (A4) precursor protein-binding, family B, member 1 interacting protein |
| 1.007                                         | 0     | 25383   | APOBEC1   | apolipoprotein B mRNA editing enzyme, catalytic polypeptide 1                       |
| 0.861                                         | 0.002 | 500246  | ARHGAP25  | Rho GTPase activating protein 25                                                    |
| 1.404                                         | 0.001 | 362456  | ARHGDI3   | Rho GDP dissociation inhibitor (GDI) beta                                           |
| 1.536                                         | 0.003 | 54227   | ARPC1B    | actin related protein 2/3 complex, subunit 1B, 41kDa                                |
| 2.243                                         | 0.014 | 25389   | ATF3      | activating transcription factor 3                                                   |
| 0.315                                         | 0.005 | 309103  | ATHL1     | ATH1, acid trehalase-like 1 (yeast)                                                 |
| 0.841                                         | 0.001 | 308444  | AXL       | AXL receptor tyrosine kinase                                                        |
| 1.482                                         | 0     | 498355  | AY616753  | cDNA sequence, AY616753                                                             |
| 0.405                                         | 0.03  | 24223   | B2M       | beta-2-microglobulin                                                                |
| 1.558                                         | 0     | 366988D | BIN2      | bridging integrator 2                                                               |
| 0.587                                         | 0.011 | 366988D | BIN2      | bridging integrator 2                                                               |
| -0.246                                        | 0.041 | 29138   | BSN       | bassoon (presynaptic cytomatrix protein)                                            |
| 0.419                                         | 0.022 | 29618   | BTG1      | B-cell translocation gene 1, anti-proliferative                                     |
| 0.165                                         | 0.046 | 498368  | C4ORF19   | chromosome 4 open reading frame 19                                                  |
| 0.485                                         | 0.009 | 313155  | C9ORF72   | chromosome 9 open reading frame 72                                                  |
| 0.678                                         | 0     | 64171   | CARD9     | caspace recruitment domain family, member 9                                         |
| 1.67                                          | 0.049 | 24770   | CCL13     | chemokine (C-C motif) ligand 13                                                     |
| 1.829                                         | 0     | 29185   | CD37      | CD37 molecule                                                                       |
| 1.564                                         | 0     | 24932   | CD4       | CD4 molecule                                                                        |
| 2.837                                         | 0     | 287435  | CD68      | CD68 molecule                                                                       |
| 1.017                                         | 0.002 | 288093  | CDGAP     | Cdc42 GTPase-activating protein                                                     |
| 1.289                                         | 0.008 | 155012  | CFH       | complement factor H                                                                 |
| 0.722                                         | 0.004 | 292999  | CHSY1     | carbohydrate (chondroitin) synthase 1                                               |
| 0.43                                          | 0.049 | 501065  | CMTM7     | CKLF-like MARVEL transmembrane domain containing 7                                  |
| 0.666                                         | 0.011 | 50998   | COIL      | coilin                                                                              |
| 0.916                                         | 0     | 155151  | CORO1A    | coronin, actin binding protein, 1A                                                  |
| 2.085                                         | 0     | 24268D  | CP        | ceruloplasmin (ferroxidase)                                                         |
| 1.066                                         | 0.035 | 24268D  | CP        | ceruloplasmin (ferroxidase)                                                         |
| 0.513                                         | 0.01  | 24268D  | CP        | ceruloplasmin (ferroxidase)                                                         |
| 0.339                                         | 0.023 | 289185  | CREG1     | cellular repressor of E1A-stimulated genes 1                                        |
| 0.586                                         | 0.007 | 25423   | CTSC      | cathepsin C                                                                         |
| 1.627                                         | 0.048 | 171056  | CX3CR1    | chemokine (C-X3-C motif) receptor 1                                                 |

|       |       |         |          |                                                                     |
|-------|-------|---------|----------|---------------------------------------------------------------------|
| 5.152 | 0     | 498335  | CXCL13   | chemokine (C-X-C motif) ligand 13 (B-cell chemoattractant)          |
| 0.923 | 0.001 | 497942  | CXCL16   | chemokine (C-X-C motif) ligand 16                                   |
| 1.318 | 0     | 79129   | CYBA     | cytochrome b-245, alpha polypeptide                                 |
| 0.724 | 0.005 | 66021   | CYBB     | cytochrome b-245, beta polypeptide (chronic granulomatous disease)  |
| 0.681 | 0.02  | 116663  | DUSP6    | dual specificity phosphatase 6                                      |
| 0.611 | 0.033 | 309112  | EFCAB4A  | EF-hand calcium binding domain 4A                                   |
| 0.536 | 0.023 | 192204  | EHD4     | EH-domain containing 4                                              |
| 0.987 | 0.011 | 362871  | ELK3     | ELK3, ETS-domain protein (SRF accessory protein 2)                  |
| 0.626 | 0.003 | 309186  | FERMT3   | fermitin family homolog 3 (Drosophila)                              |
| 0.278 | 0.038 | 360903  | FGFRL1   | fibroblast growth factor receptor-like 1                            |
| 0.894 | 0     | 500943  | FLJ32810 | hypothetical protein FLJ32810                                       |
| 1.554 | 0     | 171164  | GBP2     | guanylate binding protein 2, interferon-inducible                   |
| 0.525 | 0.02  | 290637  | GLT25D1  | glycosyltransferase 25 domain containing 1                          |
| 0.863 | 0.003 | 113940  | GMFG     | glia maturation factor, gamma                                       |
| 0.552 | 0.004 | 299825  | GNS      | glucosamine (N-acetyl)-6-sulfatase (Sanfilippo disease IIID)        |
| 1.743 | 0     | 113955  | GPNMB    | glycoprotein (transmembrane) nmb                                    |
| 1.505 | 0     | 29143   | GRN      | granulin                                                            |
| 0.348 | 0.001 | 309607  | H2-BL    | histocompatibility 2, blastocyst                                    |
| 0.547 | 0.045 | 25734   | HCK      | hemopoietic cell kinase                                             |
| 0.742 | 0.004 | 294673  | HEXB     | hexosaminidase B (beta polypeptide)                                 |
| 1.344 | 0.001 | 294274  | HLA-DMA  | major histocompatibility complex, class II, DM alpha                |
| 1.362 | 0     | 294273  | HLA-DMB  | major histocompatibility complex, class II, DM beta                 |
| 0.963 | 0.009 | 294228  | HLA-E    | major histocompatibility complex, class I, E                        |
| 0.341 | 0.008 | 287828  | HN1      | hematological and neurological expressed 1                          |
| 1.158 | 0.002 | 25464   | ICAM1    | intercellular adhesion molecule 1 (CD54), human rhinovirus receptor |
| 0.824 | 0.011 | 499415  | ICOSLG   | inducible T-cell co-stimulator ligand                               |
| 0.602 | 0.022 | 360697D | IFNGR2   | interferon gamma receptor 2 (interferon gamma transducer 1)         |
| 0.339 | 0.004 | 360697D | IFNGR2   | interferon gamma receptor 2 (interferon gamma transducer 1)         |
| 0.632 | 0.03  | 252963  | IL13RA1  | interleukin 13 receptor, alpha 1                                    |
| 0.877 | 0.021 | 312679  | IL17RA   | interleukin 17 receptor A                                           |
| 1.648 | 0     | 29197   | IL18     | interleukin 18 (interferon-gamma-inducing factor)                   |
| 1.017 | 0.002 | 54259   | INPP5D   | inositol polyphosphate-5-phosphatase, 145kDa                        |
| 0.549 | 0.047 | 24508   | IRF1     | interferon regulatory factor 1                                      |
| 2.589 | 0     | 292060  | IRF8     | interferon regulatory factor 8                                      |
| 0.423 | 0.028 | 25021   | ITGAM    | integrin, alpha M (complement component 3 receptor 3 subunit)       |
| 0.873 | 0.022 | 364458  | KCTD12   | potassium channel tetramerisation domain containing 12              |
| 0.746 | 0     | 361790  | KIAA1949 | KIAA1949                                                            |
| 1.348 | 0     | 287974  | KLHL6    | kelch-like 6 (Drosophila)                                           |
| 0.614 | 0.012 | 85245   | KPNA2    | karyopherin alpha 2 (RAG cohort 1, importin alpha 1)                |
| 1.272 | 0.005 | 306071  | LCP1     | lymphocyte cytosolic protein 1 (L-plastin)                          |

|       |       |         |           |                                                                                                                |
|-------|-------|---------|-----------|----------------------------------------------------------------------------------------------------------------|
| 1.034 | 0     | 155918D | LCP2      | lymphocyte cytosolic protein 2 (SH2 domain containing leukocyte protein of 76kDa)                              |
| 0.886 | 0     | 155918D | LCP2      | lymphocyte cytosolic protein 2 (SH2 domain containing leukocyte protein of 76kDa)                              |
| 1.551 | 0     | 245955  | LGALS3BP  | lectin, galactoside-binding, soluble, 3 binding protein                                                        |
| 0.57  | 0.002 | 63865   | LGMN      | legumain                                                                                                       |
| 0.72  | 0.023 | 294643  | LHFPL2    | lipoma HMGIC fusion partner-like 2                                                                             |
| 0.415 | 0.04  | 294446  | LOC294446 | similar to Myristoylated alanine-rich C-kinase substrate (MARCKS) (ACAMP-81)                                   |
| 0.33  | 0.011 | 305633  | LOC305633 | similar to Antxr2 protein                                                                                      |
| 0.415 | 0.006 | 367455  | LRG1      | leucine-rich alpha-2-glycoprotein 1                                                                            |
| 2.572 | 0     | 291359  | LY86      | lymphocyte antigen 86                                                                                          |
| 0.952 | 0.001 | 361378  | MAN2B1    | mannosidase, alpha, class 2B, member 1                                                                         |
| 0.527 | 0.025 | 315994  | MAPKAPK3  | mitogen-activated protein kinase-activated protein kinase 3                                                    |
| 0.813 | 0.007 | 499497  | MEF2C     | myocyte enhancer factor 2C                                                                                     |
| 0.494 | 0.003 | 297387  | MOBK1B    | MOB1, Mps One Binder kinase activator-like 1B (yeast)                                                          |
| 1.606 | 0.002 | 24575   | MX2       | myxovirus (influenza virus) resistance 2 (mouse)                                                               |
| 0.485 | 0.008 | 301059  | MYD88     | myeloid differentiation primary response gene (88)                                                             |
| 0.865 | 0.024 | 306825  | MYLIP     | myosin regulatory light chain interacting protein                                                              |
| 0.719 | 0.006 | 114553  | NCF1C     | neutrophil cytosolic factor 1C pseudogene                                                                      |
| 0.467 | 0.046 | 83619   | NFE2L2    | nuclear factor (erythroid-derived 2)-like 2                                                                    |
| 0.566 | 0.004 | 81736   | NFKB1     | nuclear factor of kappa light polypeptide gene enhancer in B-cells 1 (p105)                                    |
| 0.859 | 0     | 286898  | NPC2      | Niemann-Pick disease, type C2                                                                                  |
| 0.548 | 0.001 | 60338   | NR2F6     | nuclear receptor subfamily 2, group F, member 6                                                                |
| 1.106 | 0.029 | 246331  | NRP1      | neuropilin 1                                                                                                   |
| 1.049 | 0.009 | 58813   | NT5E      | 5'-nucleotidase, ecto (CD73)                                                                                   |
| 0.679 | 0.032 | 315594  | OAF       | OAF homolog (Drosophila)                                                                                       |
| 0.541 | 0.012 | 171108  | P2RY14    | purinergic receptor P2Y, G-protein coupled, 14                                                                 |
| 1.087 | 0.002 | 117264  | P2RY6     | pyrimidinergic receptor P2Y, G-protein coupled, 6                                                              |
| 1.016 | 0     | 303903  | PARP14    | poly (ADP-ribose) polymerase family, member 14                                                                 |
| 1.499 | 0     | 303905  | PARP9     | poly (ADP-ribose) polymerase family, member 9                                                                  |
| 0.554 | 0.04  | 24915   | PDLIM4    | PDZ and LIM domain 4                                                                                           |
| 1.166 | 0     | 24653   | PLA2G4A   | phospholipase A2, group IVA (cytosolic, calcium-dependent)                                                     |
| 1.57  | 0     | 364206  | PLEK      | pleckstrin                                                                                                     |
| 0.557 | 0.001 | 170538  | PRKCD     | protein kinase C, delta                                                                                        |
| 0.752 | 0.001 | 81750   | PROS1     | protein S (alpha)<br>proteasome (prosome, macropain) subunit, beta type, 8 (large multifunctional peptidase 7) |
| 2.214 | 0     | 24968   | PSMB8     | proteasome (prosome, macropain) subunit, beta type, 8 (large multifunctional peptidase 7)                      |
| 0.832 | 0.001 | 29630   | PSME1     | proteasome (prosome, macropain) activator subunit 1 (PA28 alpha)                                               |
| 0.575 | 0.011 | 24697   | PTPN1     | protein tyrosine phosphatase, non-receptor type 1                                                              |
| 1.297 | 0     | 116689  | PTPN6     | protein tyrosine phosphatase, non-receptor type 6                                                              |
| 1.732 | 0     | 24699D  | PTPRC     | protein tyrosine phosphatase, receptor type, C                                                                 |
| 1.441 | 0.001 | 24699D  | PTPRC     | protein tyrosine phosphatase, receptor type, C                                                                 |

|       |       |         |            |                                                                                             |
|-------|-------|---------|------------|---------------------------------------------------------------------------------------------|
| 1.367 | 0     | 282817  | PYCARD     | PYD and CARD domain containing                                                              |
| 0.601 | 0.041 | 64035   | PYGL       | phosphorylase, glycogen; liver (Hers disease, glycogen storage disease type VI)             |
| 1.757 | 0     | 366957  | RAC2       | ras-related C3 botulinum toxin substrate 2 (rho family, small GTP binding protein Rac2)     |
| 0.368 | 0.007 | 171337  | RAP1B      | RAP1B, member of RAS oncogene family                                                        |
| 0.266 | 0     | 288589  | RASA4      | RAS p21 protein activator 4                                                                 |
| 3.644 | 0.018 | 24618   | REG3A      | regenerating islet-derived 3 alpha                                                          |
|       |       |         | RGD1562552 |                                                                                             |
| 1.695 | 0.005 | 498840  | PREDICTED  | similar to hypothetical protein LOC340061 (predicted)                                       |
| 0.612 | 0.001 | 54290   | RGS10      | regulator of G-protein signaling 10                                                         |
| 0.483 | 0.003 | 84583   | RGS2       | regulator of G-protein signaling 2, 24kDa                                                   |
| 0.265 | 0.047 | 29426   | RPS4X      | ribosomal protein S4, X-linked                                                              |
| 1.254 | 0     | 362720  | RRM2       | ribonucleotide reductase M2 polypeptide                                                     |
| 0.753 | 0.001 | 65168   | SCAMP2     | secretory carrier membrane protein 2                                                        |
| 2.331 | 0     | 291091  | SERPINB1   | serpin peptidase inhibitor, clade B (ovalbumin), member 1                                   |
| 0.696 | 0.002 | 58838   | SH2B3      | SH2B adaptor protein 3                                                                      |
| 0.376 | 0.012 | 25528   | SIRPA      | signal-regulatory protein alpha                                                             |
| 1.412 | 0     | 338477  | SLA        | Src-like-adaptor                                                                            |
| 0.284 | 0.028 | 83509   | SLC7A7     | solute carrier family 7 (cationic amino acid transporter, y+ system), member 7              |
| 1.135 | 0     | 140860  | SLCO2B1    | solute carrier organic anion transporter family, member 2B1                                 |
| 0.57  | 0.011 | 81782   | SOAT1      | sterol O-acyltransferase (acyl-Coenzyme A: cholesterol acyltransferase) 1                   |
| 1.224 | 0.001 | 301570  | SP110      | SP110 nuclear body protein                                                                  |
| 0.676 | 0.039 | 25124D  | STAT1      | signal transducer and activator of transcription 1, 91kDa                                   |
| 0.444 | 0.033 | 25124D  | STAT1      | signal transducer and activator of transcription 1, 91kDa                                   |
| 0.555 | 0.003 | 360161  | STC1       | stanniocalcin 1                                                                             |
| 0.612 | 0.009 | 29398   | STK10      | serine/threonine kinase 10                                                                  |
| 0.464 | 0.035 | 89815   | SYNGR2     | synaptogyrin 2                                                                              |
| 0.762 | 0.001 | 64523   | TEP1       | telomerase-associated protein 1                                                             |
| 0.854 | 0.003 | 59086   | TGFB1      | transforming growth factor, beta 1                                                          |
| 0.873 | 0.004 | 29591   | TGFBR1     | transforming growth factor, beta receptor I (activin A receptor type II-like kinase, 53kDa) |
| 0.922 | 0.008 | 25625   | TNFRSF1A   | tumor necrosis factor receptor superfamily, member 1A                                       |
| -1.4  | 0.028 | 296369  | TNNC2      | troponin C type 2 (fast)                                                                    |
| 0.962 | 0     | 117557  | TPM3       | tropomyosin 3                                                                               |
| 0.325 | 0.014 | 312903  | TRAM1      | translocation associated membrane protein 1                                                 |
| 1.198 | 0.002 | 171048  | TSPAN8     | tetraspanin 8                                                                               |
| 2.379 | 0     | 24230   | TSPO       | translocator protein (18kDa)                                                                |
| 1.03  | 0.007 | 54315   | UCP2       | uncoupling protein 2 (mitochondrial, proton carrier)                                        |
| 1.004 | 0.002 | 113992D | UGT1A6     | UDP glucuronosyltransferase 1 family, polypeptide A6                                        |
| 0.619 | 0     | 113992D | UGT1A6     | UDP glucuronosyltransferase 1 family, polypeptide A6                                        |
| 0.684 | 0.002 | 361517  | VASP       | vasodilator-stimulated phosphoprotein                                                       |
| 1.243 | 0     | 25156   | VAV1       | vav 1 guanine nucleotide exchange factor                                                    |



|        |          |        |         |                                         |
|--------|----------|--------|---------|-----------------------------------------|
| 0.545  | 0.024    | 29461  | VGF     | VGF nerve growth factor inducible       |
| 0.799  | 0.004    | 29344  | ZFP36L1 | zinc finger protein 36, C3H type-like 1 |
| 0.866  | 0.001    | 298765 | ZFP36L2 | zinc finger protein 36, C3H type-like 2 |
| 0.415  | 0.008--- |        |         |                                         |
| 0.79   | 0---     |        |         |                                         |
| 0.302  | 0.007--- |        |         |                                         |
| 0.814  | 0.017    | 300225 |         |                                         |
| 0.519  | 0---     |        |         |                                         |
| 1.292  | 0---     |        |         |                                         |
| 1.681  | 0.011--- |        |         |                                         |
| 0.696  | 0.009--- |        |         |                                         |
| 0.896  | 0---     |        |         |                                         |
| 0.677  | 0.011--- |        |         |                                         |
| 0.474  | 0.007--- |        |         |                                         |
| 0.732  | 0---     |        |         |                                         |
| -0.268 | 0.007--- |        |         |                                         |
| 0.592  | 0.017--- |        |         |                                         |
| -0.625 | 0.001--- |        |         |                                         |
